# Supplementary material
Source: Springer Nature journal article supplement (https://www.springermedizin.de/resource/supplementary/12990_2008_202_MOESM4_ESM.pdf/9612776)

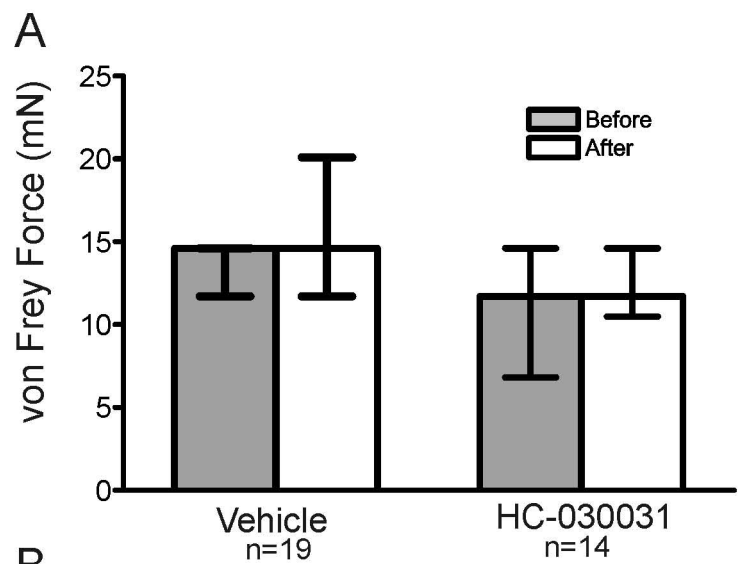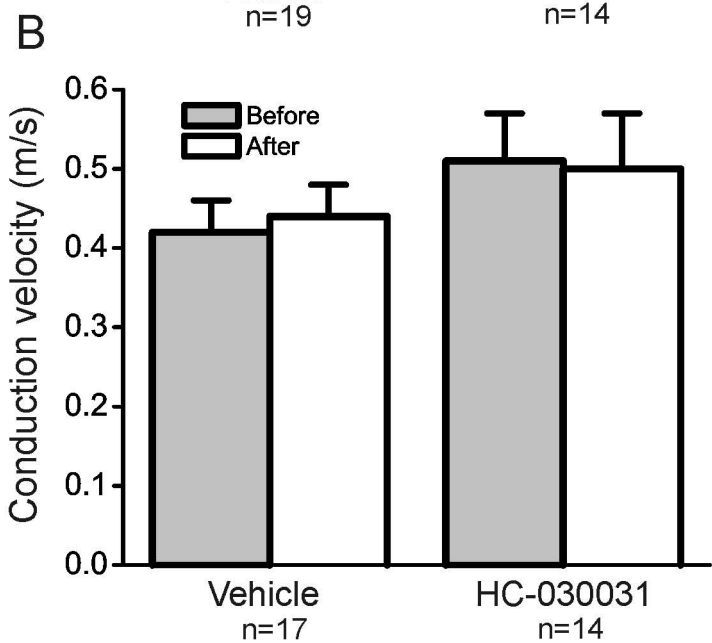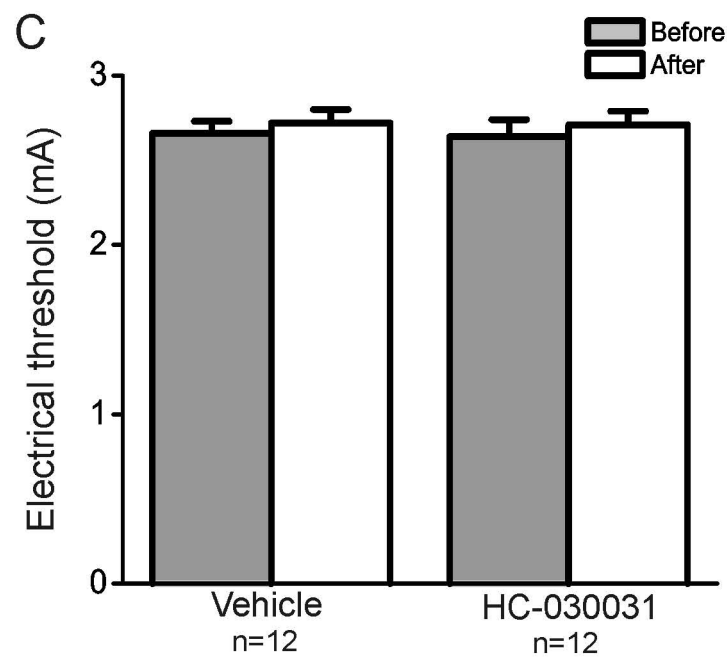

Supplement: MOESM4 [file 9612776]
